# Supplementary material
Source: Springer Nature journal article supplement (https://www.springermedizin.de/resource/supplementary/13550_2013_147_MOESM1_ESM.pdf/9687688)

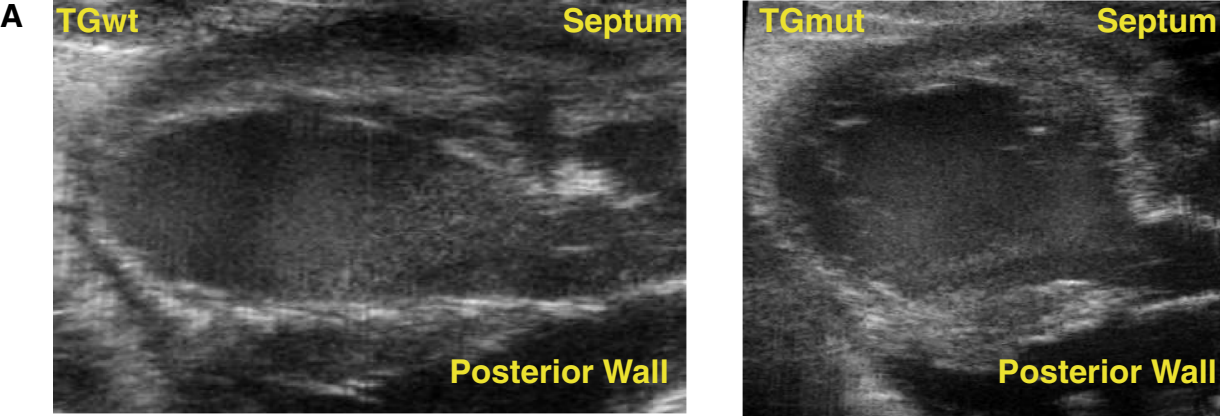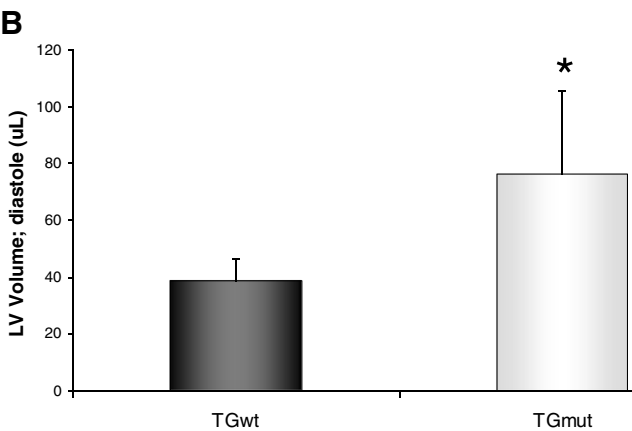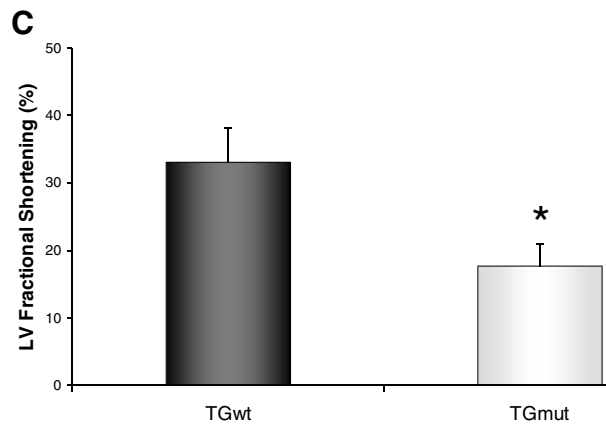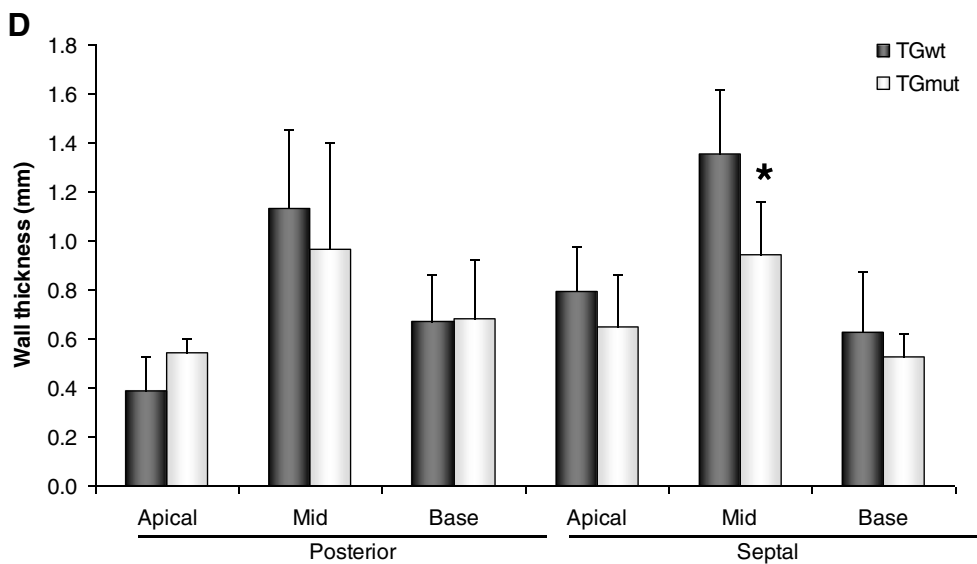

Supplement: MOESM1 [file 9687688]
